# Supplementary material for: Plasmonic coloration of silver nanodome arrays for a smartphone-based plasmonic biosensor
Source: PubMed Central journal article supplement — Nanoscale Adv. 2019 Aug 6;1(9):3699–708. doi: 10.1039/c9na00315k (PMC9417651; doi:10.1039/c9na00315k), 2019-08-06
Supplement: NA-001-C9NA00315K-s002.pdf [file NA-001-C9NA00315K-s002.pdf]

*Supporting information for*

# Plasmonic Coloration of silver Nanodome Arrays for smartphone-based plasmonic biosensor

*Mana Toma,<sup>\*,a,†</sup> and Keiko Tawa<sup>a</sup>*

<sup>a</sup>Department of Applied Chemistry for Environment, School of Science and Technology,  
Kwansei Gakuin University, Sanda, Japan 669-1337.

† Present address: Department of Electrical and Electronic Engineering, School of Engineering,  
Tokyo Institute Technology, Yokohama, Japan 226-5919

E-mail: toma.m.aa@m.titech.ac.jp.

**KEYWORDS:** Plasmonic coloration, biosensors, colorimetric detection, metal nanostructure  
arrays, DNA hybridization.

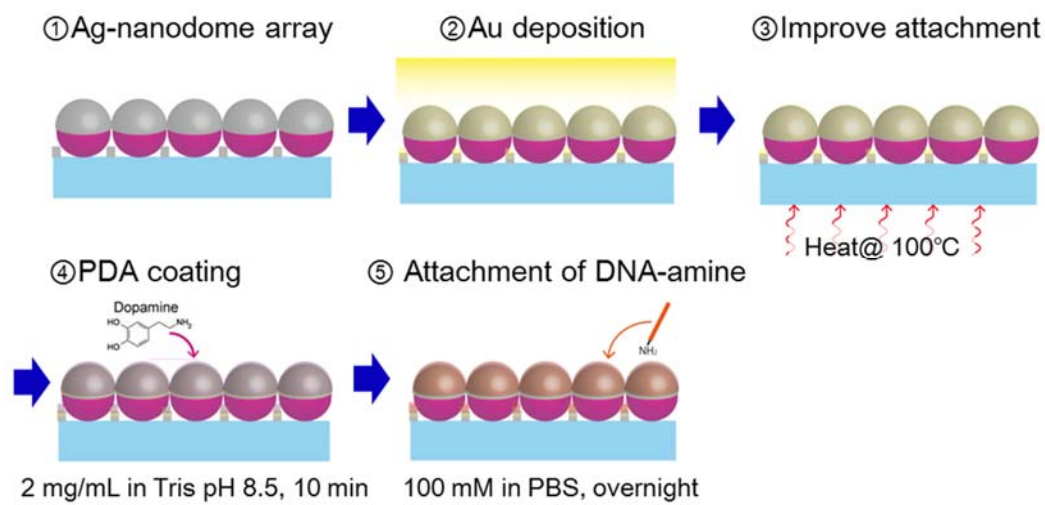

Figure S1 Schematic drawing the surface functionalization of metal nanodome arrays for detection of DNA hybridization.

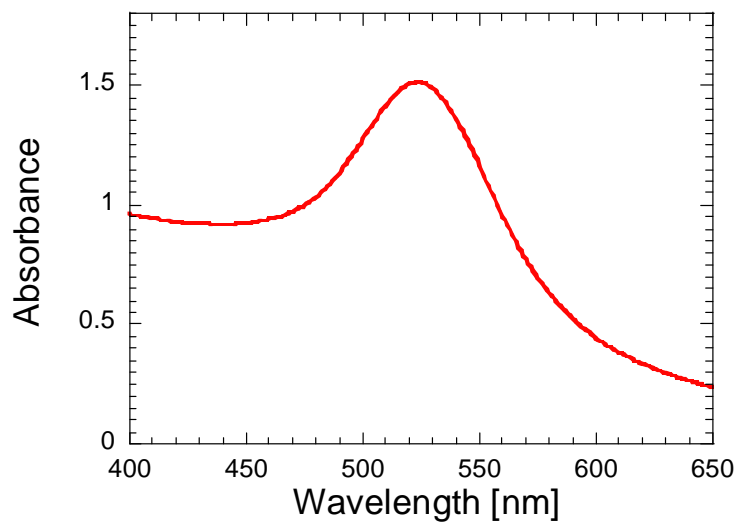

Figure S2 UV-vis absorption spectra of DNA-AuNPs.

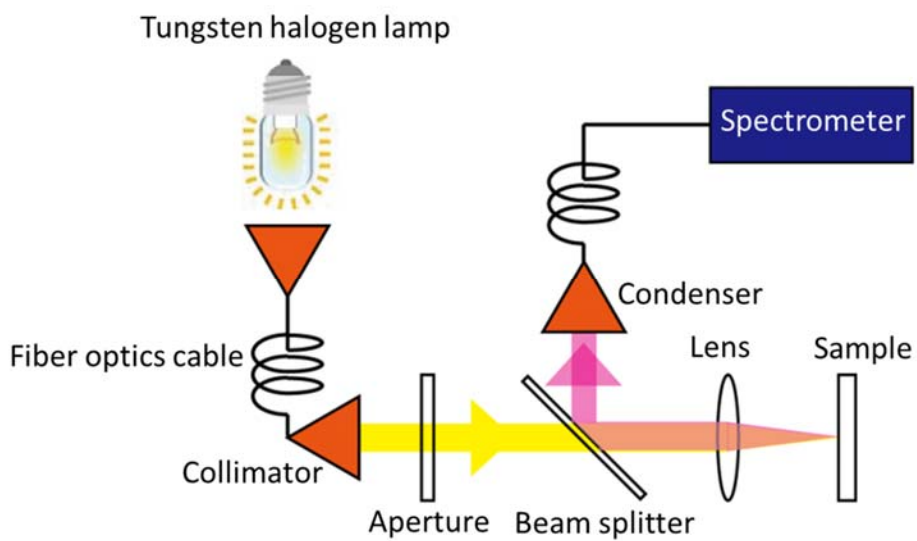

Figure S3 Sketch of the laboratory-built optical setup

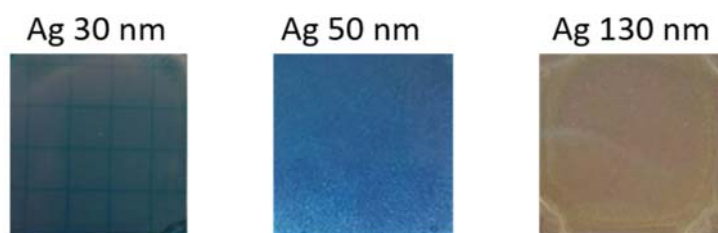

Figure S4 Photographs of Ag nanodome arrays ( $\phi=350$  nm) with various thickness of Ag films.

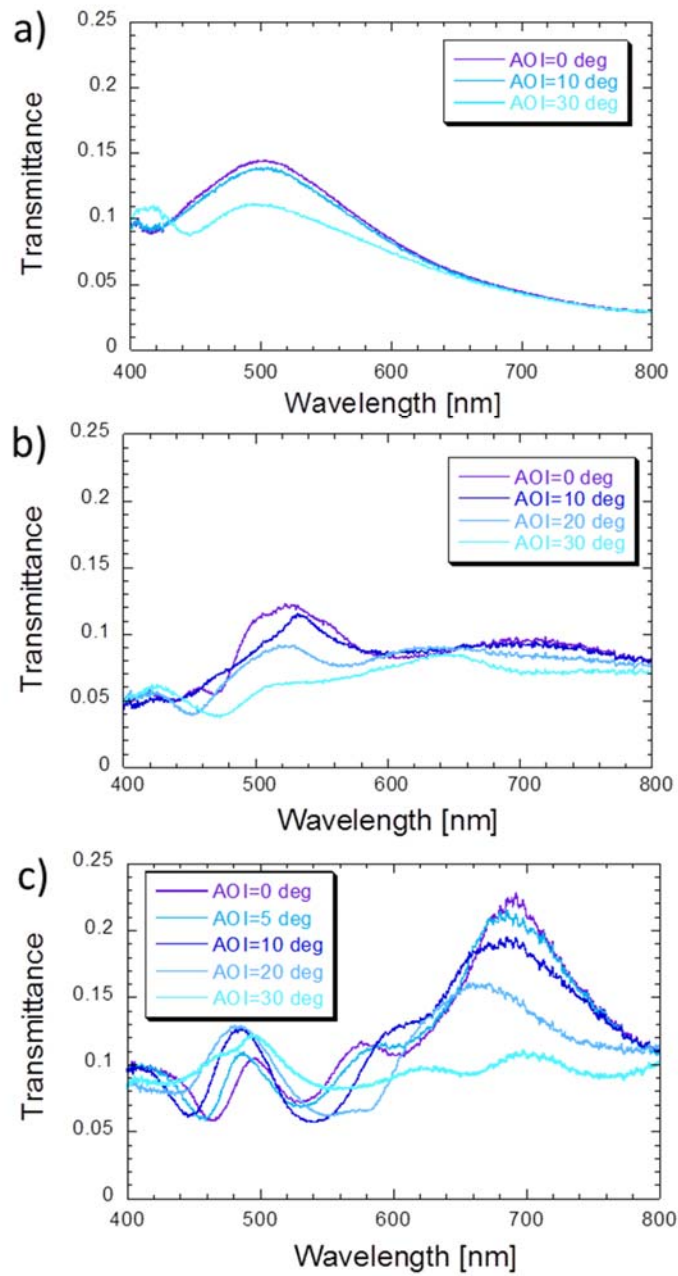

Figure S 5 Transmission spectra of Ag nanodome arrays in contact with air taken at various incident angles. The dome diameter of Ag nanodome arrays are (a) 200 nm, (b) 350 nm and (c) 500 nm.
